# Supplementary material for: Interaction of cyclodextrins with pyrene-modified polyacrylamide in a mixed solvent of water and dimethyl sulfoxide as studied by steady-state fluorescence
Source: publisher site journal article supplement (doi:10.3762/bjoc.8.150), 2012-08-16
Supplement: Additional file 1 [file 1860-5397-8-150-S1.pdf]

## Supporting Information

for

# **Interaction of cyclodextrins with pyrene-modified polyacrylamide in a mixed solvent of water and dimethyl sulfoxide as studied by steady-state fluorescence**

Akihito Hashidzume<sup>1</sup>, Yongtai Zheng<sup>1</sup> and Akira Harada<sup>\*1,2</sup>

Address: <sup>1</sup>Department of Macromolecular Science, Graduate School of Science, Osaka University, 1-1 Machikaneyama-cho, Toyonaka, Osaka 560-0043, Japan and

<sup>2</sup>Japan Science and Technology Agency (JST), Core Research for Evolutional Science and Technology (CREST), 7 Gobancho, Chiyoda-ku, Tokyo 102-0076, Japan

Email: Akira Harada - harada@chem.sci.osaka-u.ac.jp

\* Corresponding author

## **Equilibria for the CDs/pAAMPy systems**

## The CD-Free System

Scheme 2a shows a simplified equilibrium in the CD-free system, where Py is the Py residue, which can form Py dimer ( $\text{Py}_2$ ). The equilibrium constant for the Py dimer formation ( $K_{\text{Py}}$ ) is defined as

$$K_{\text{Py}} = \frac{[\text{Py}_2]}{[\text{Py}]^2} \quad (\text{S1})$$

where  $[\text{Py}]$  and  $[\text{Py}_2]$  denote the concentrations of Py monomer and dimer, respectively. Thus,

$$[\text{Py}_2] = K_{\text{Py}}[\text{Py}]^2 \quad (\text{S2})$$

In this study, a significant fraction of Py residues ( $\text{Py}^\circ$ ) cannot form  $\text{Py}_2$ , and the mole fraction of  $\text{Py}^\circ$  is defined as  $f$ . Based on the conservation of mass,

$$(1 - f)[\text{Py}]_0 = [\text{Py}] + 2[\text{Py}_2] \quad (\text{S3})$$

where  $[\text{Py}]_0$  is the total concentration of Py residue. Substituting eq S2 into eq S3, it can be solved for  $[\text{Py}]$  as

$$[\text{Py}] = \frac{-1 + \sqrt{1 + 8K_{\text{Py}}(1 - f)[\text{Py}]_0}}{4K_{\text{Py}}} \quad (\text{S4})$$

Substituting eq S4 into eq S2,

$$[\text{Py}_2] = \frac{1 - \sqrt{1 + 8K_{\text{Py}}(1 - f)[\text{Py}]_0} + 4K_{\text{Py}}(1 - f)[\text{Py}]_0}{8K_{\text{Py}}} \quad (\text{S5})$$

When  $K_{\text{Py}}$ ,  $f$ , and  $[\text{Py}]_0$  are given,  $[\text{Py}]$  and  $[\text{Py}_2]$  can be calculated by using eqs S4 and S5.

It is assumed that the ratio of fluorescence intensities at 480 and 376 nm ( $I_{480}/I_{376}$ ) can be calculated as

$$I_{480} / I_{376} = \frac{A_{1,480}([\text{Py}] + [\text{Py}^\circ]) + A_{2,480}[\text{Py}_2] + B_{480}}{A_{1,376}([\text{Py}] + [\text{Py}^\circ]) + A_{2,376}[\text{Py}_2] + B_{376}} \quad (\text{S6})$$

where  $A_{1,376}$ ,  $A_{1,480}$ ,  $A_{2,376}$ , and  $A_{2,480}$  are constants corresponding to the products of the molar extinction coefficient and fluorescence quantum yield (subscripts 1 and 2 indicate monomeric and dimeric Py residues, respectively, and subscripts 376 and 480 indicate the wavelengths), and  $B_{376}$  and  $B_{480}$  are constants corresponding to the background. Substituting eqs S2 and S4 into eq S6, it can be solved for  $K_{Py}$  as

$$K_{Py} = \frac{x^2 - 1}{8(1-f)[Py]_0} \quad (S7)$$

where

$$x = \frac{2\left(\frac{I_{480}}{I_{376}} A_{1,376} - A_{1,480}\right)(f-2)[Py]_0 + \left(\frac{I_{480}}{I_{376}} A_{2,376} - A_{2,480}\right)(1-f)[Py]_0 - 2\left(\frac{I_{480}}{I_{376}} B_{376} - B_{480}\right)}{2\left(\frac{I_{480}}{I_{376}} A_{1,376} - A_{1,480}\right)f[Py]_0 + \left(\frac{I_{480}}{I_{376}} A_{2,376} - A_{2,480}\right)(1-f)[Py]_0 - 2\left(\frac{I_{480}}{I_{376}} B_{376} - B_{480}\right)} \quad (S8)$$

Since  $I_{480}/I_{376}$  values are known at different  $x_{DMSO}$ ,  $K_{Py}$  can be calculated at different  $x_{DMSO}$  when  $A_{1,480}/A_{1,376}$ ,  $A_{2,376}/A_{1,376}$ ,  $A_{2,480}/A_{1,376}$ ,  $B_{376}/A_{1,376}$ ,  $B_{480}/A_{1,376}$ , and  $f$  are given. For simplicity, it is assumed here that  $A_{2,376} = 0$  and  $B_{376} = B_{480} = 0$ . Assuming that all the Py residues are in the monomer state at  $x_{DMSO} = 1$ ,  $A_{1,480}/A_{1,376} = 0.025$  ( $= I_{480}/I_{376}$  at  $x_{DMSO} = 1$ ). In this study, both  $A_{2,480}/A_{1,376}$  and  $f$  are fixed at 0.5.

## The $\beta$ -CD/pAAMPy System

Scheme 2b shows simplified equilibria for the  $\beta$ -CD/pAAMPy system, where  $CD \cdot Py$  and  $CD \cdot Py^\circ$  are inclusion complexes. The equilibrium constants ( $K_{Py}$  and  $K_\beta$ ) are expressed as

$$K_{Py} = \frac{[Py_2]}{[Py]^2} \quad (S9)$$

$$K_\beta = \frac{[CD \cdot Py]}{[CD][Py]} = \frac{[CD \cdot Py^\circ]}{[CD][Py^\circ]} \quad (S10)$$

where  $[Py]$ ,  $[Py^\circ]$ ,  $[CD]$ ,  $[CD \cdot Py]$ , and  $[CD \cdot Py^\circ]$  denote the concentrations of  $Py$ ,  $Py^\circ$ , free  $CD$ , the complexes of  $CD$  with  $Py$  and with  $Py^\circ$ , respectively. From eqs S9 and S10,

$$[Py_2] = K_{Py}[Py]^2 \quad (S11)$$

$$[CD \cdot Py] = K_\beta[CD][Py] \quad (S12)$$

$$[CD \cdot Py^\circ] = K_\beta[CD][Py^\circ] \quad (S13)$$

Based on the conservation of mass,

$$(1 - f)[Py]_0 = [Py] + 2[Py_2] + [CD \cdot Py] \quad (S14)$$

$$f[Py]_0 = [Py^\circ] + [CD \cdot Py^\circ] \quad (S15)$$

$$[CD]_0 = [CD] + [CD \cdot Py] \quad (S16)$$

where  $[CD]_0$  is the total concentration of  $CD$ . Substituting eqs S11 and S12 into eq S14, it can be solved for  $[Py]$  as

$$[Py] = \frac{-(1 + K_\beta[CD]) + \sqrt{(1 + K_\beta[CD])^2 + 8K_{Py}(1 - f)[Py]_0}}{4K_{Py}} \quad (S17)$$

Substituting eq S13 into eq S15, it can be solved for  $[Py^\circ]$  as

$$[Py^\circ] = \frac{f[Py]_0}{1 + K_\beta[CD]} \quad (S18)$$

When  $K_{Py}$ ,  $K_\beta$ ,  $[CD]$ , and  $[Py]_0$  are given,  $[Py_2]$ ,  $[CD \cdot Py]$ , and  $[CD \cdot Py^\circ]$  can be calculated by substituting eqs S17 and S18 into eqs S11 – S13.

$I_{480}/I_{376}$  can be calculated as

$$I_{480}/I_{376} = \frac{A_{1,480}([Py] + [Py^\circ]) + A'_{1,480}([CD \cdot Py] + [CD \cdot Py^\circ]) + A_{2,480}[Py_2] + B_{480}}{A_{1,376}([Py] + [Py^\circ]) + A'_{1,376}([CD \cdot Py] + [CD \cdot Py^\circ]) + A_{2,376}[Py_2] + B_{376}} \quad (S19)$$

where  $A'_{1,376}$  and  $A'_{1,480}$  are also constants. In this study,  $A'_{1,480}/A'_{1,376}$  is also fixed at 0.025. It is also likely that  $A_{2,376} = 0$ . The free  $CD$  concentration ( $[CD]$ ) is necessary for these calculations, but only  $[CD]_0$  is known in experiments. Thus, upon the fitting procedure,  $[CD]_0$  values calculated numerically with eq S16 were used.

## The $\gamma$ -CD/pAAMPy System

Scheme 2c shows simplified equilibria for the  $\gamma$ -CD/pAAMPy system. The equilibrium constants ( $K_{Py}$  and  $K_\gamma$ ) are expressed as

$$K_{Py} = \frac{[Py_2]}{[Py]^2} \quad (S20)$$

$$K_\gamma = \frac{[CD \cdot Py_2]}{[CD][Py_2]} \quad (S21)$$

where  $[CD \cdot Py_2]$  denotes the concentration of the complex of CD with  $Py_2$ . From eqs S20 and S21,

$$[Py_2] = K_{Py}[Py]^2 \quad (S22)$$

$$[CD \cdot Py_2] = K_\gamma[CD][Py_2] \quad (S23)$$

Based on the conservation of mass,

$$(1 - f)[Py]_0 = [Py] + 2[Py_2] + 2[CD \cdot Py_2] \quad (S24)$$

$$[CD]_0 = [CD] + [CD \cdot Py_2] \quad (S25)$$

Substituting eqs S22 and S23 into eq S24, it can be solved for  $[Py]$  as

$$[Py] = \frac{-1 + \sqrt{1 + 4(K_{Py} + K_{Py}K_\gamma[CD])(1 - f)[Py]_0}}{2(K_{Py} + K_{Py}K_\gamma[CD])} \quad (S26)$$

When  $K_{Py}$ ,  $K_\gamma$ ,  $[CD]$ , and  $[Py]_0$  are given,  $[Py_2]$  and  $[CD \cdot Py_2]$  can be calculated by substituting eq S26 into eqs S22 and S23.

$I_{480}/I_{376}$  can be calculated as

$$I_{480}/I_{376} = \frac{A'_{1,480}([Py] + [Py^o]) + A'_{2,480}[Py_2] + A'_{2,480}[CD \cdot Py_2] + B_{480}}{A'_{1,376}([Py] + [Py^o]) + A'_{2,376}[Py_2] + A'_{2,376}[CD \cdot Py_2] + B_{376}} \quad (S27)$$

where  $A'_{2,480}$  is also a constant. It is also likely that  $A_{2,376} = A'_{2,376} = 0$ . The free CD concentration ( $[CD]$ ) is necessary for these calculations, but only  $[CD]_0$  is known in experiments. Thus, upon the fitting procedure,  $[CD]_0$  values calculated numerically with eq S25 were used.
